# Supplementary material
Source: PubMed Central journal article supplement (PMC2931361)

**Supplemental Figure 1.**

A) Analyses of lymphocyte gated peritoneal B1a (IgM+ CD5+) and B2 (IgM+ CD5-) cells. B) Analyses of lymphocyte gated bone marrow B cells at various stages of differentiation.

Expression of surface activation markers on CD19<sup>+</sup> gated cells from spleens and lymph nodes. Shaded histogram indicates *Tnfaip3*<sup>+/+</sup> cells, blue line is *Tnfaip3*<sup>fl/+</sup> and red line is *Tnfaip3*<sup>fl/fl</sup> B cells.

**Supplemental Figure 2.**

**Normal antigen specific B cell responses in *Tnfaip3*<sup>fl/fl</sup> *CD19-Cre* mice.**

ELISA analyses of serum Ig levels. (A) Ig isotypes levels in 5 to 7 week-old *Tnfaip3*<sup>fl/fl</sup> *CD19-Cre*, *Tnfaip3*<sup>fl/+</sup> *CD19-Cre* and *Tnfaip3*<sup>fl/+</sup> *CD19-Cre* mice (n=6) plotted as means ± SEM. \* indicates p < 0.05 by one-way ANOVA. (B) T-cell dependent, antigen specific B cell responses to NP-KLH. NP-specific antibody levels before and after immunization at the indicated time points, plotted as the geometric mean ± SEM of 5 mice. Serum dilutions of 1:200 for IgM and 1:100 for IgG1 and IgG2b are shown. \* indicates p < 0.05 by two-way ANOVA.

## Figure S 1

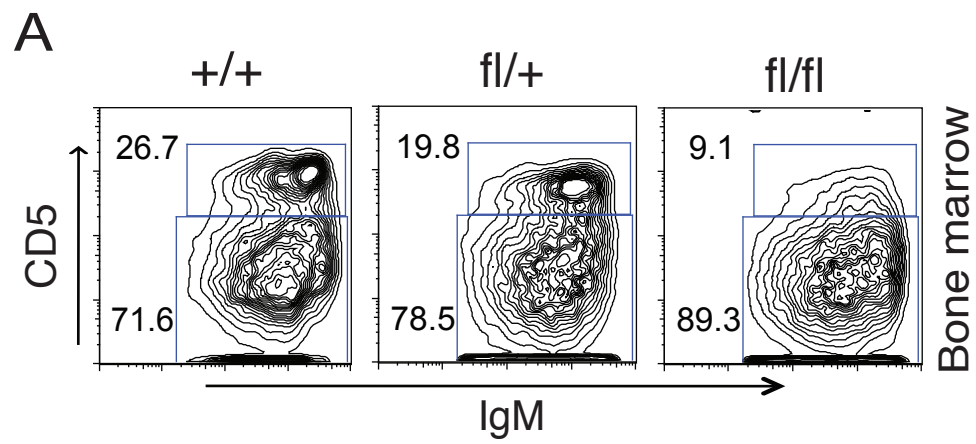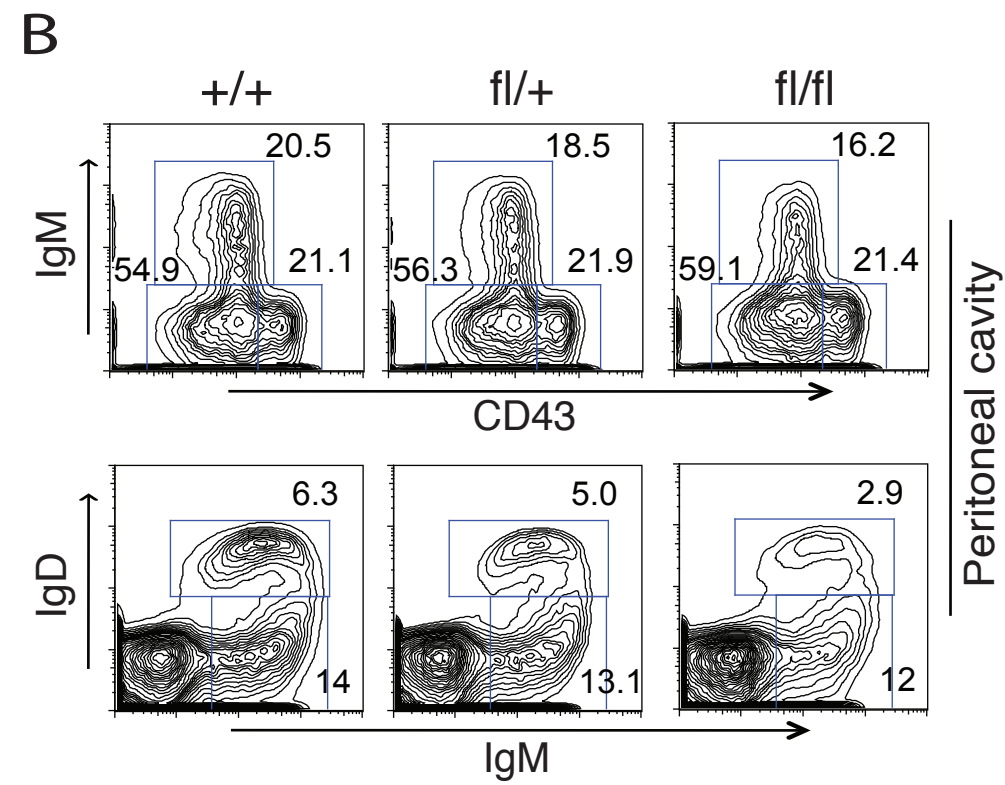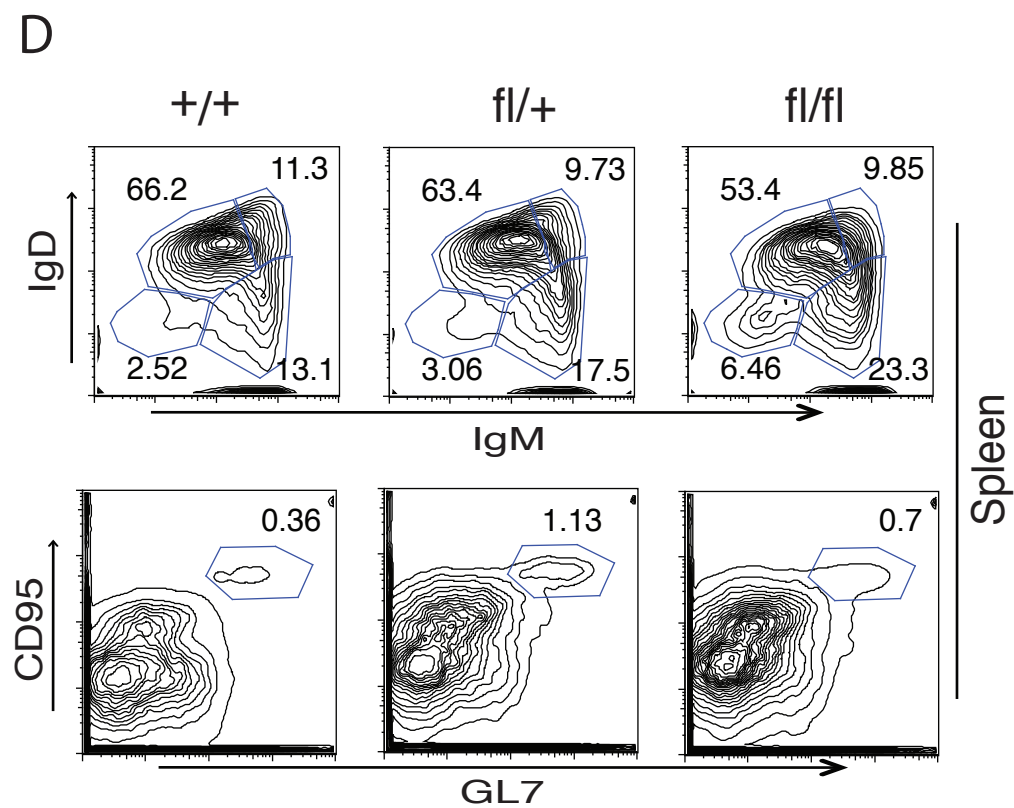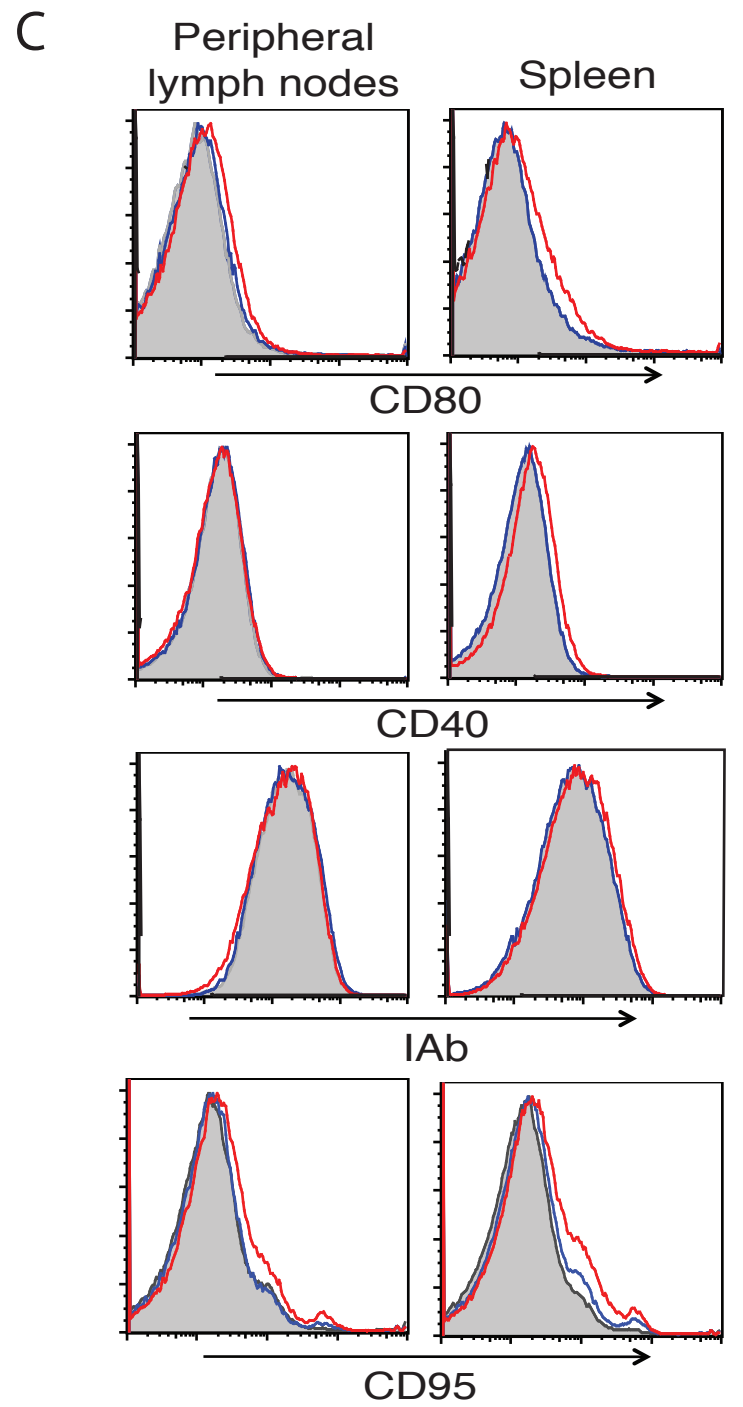

Figure S 2

A

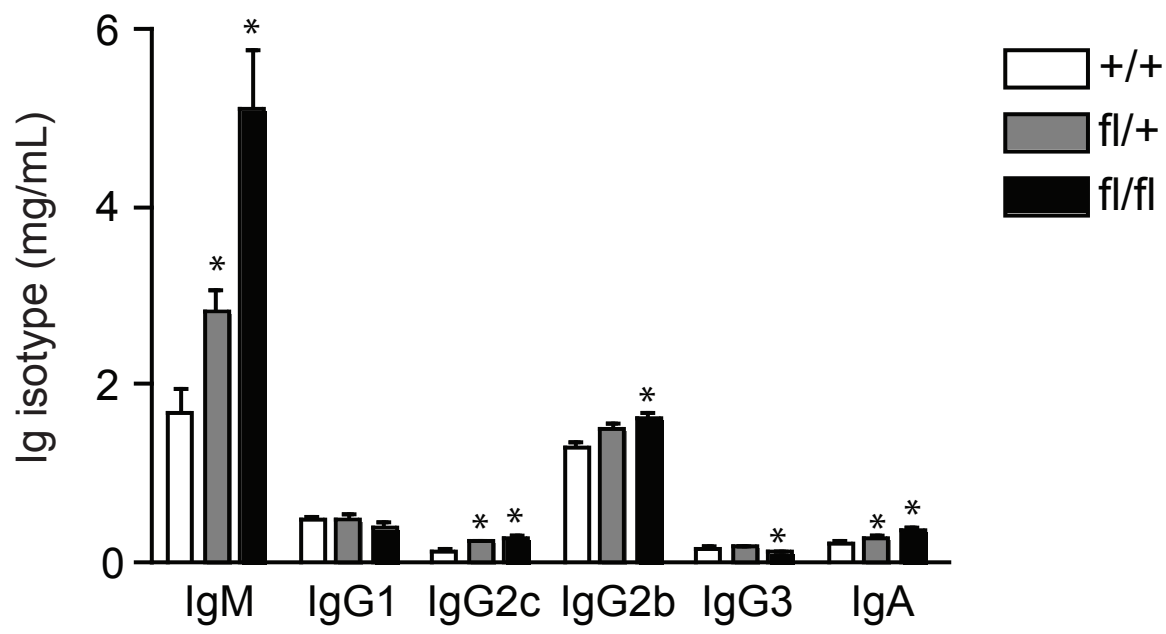

B

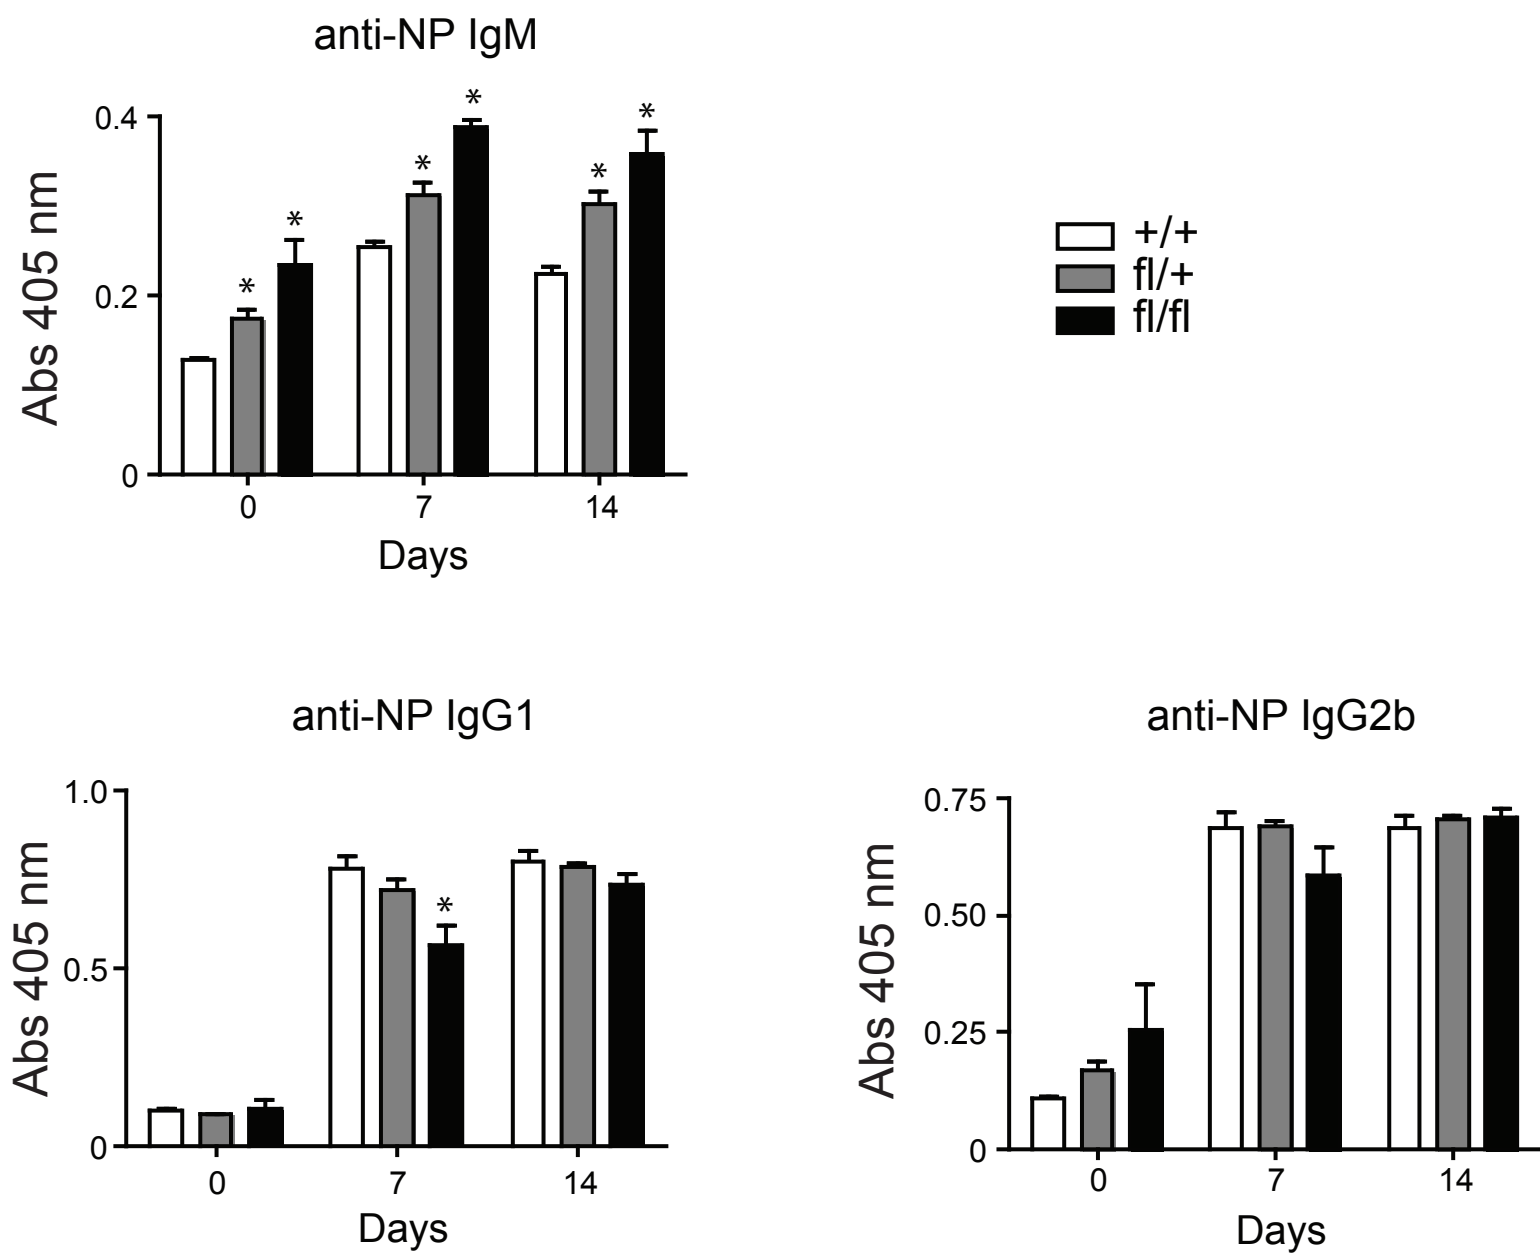

Supplement: NIHMS227374-supplement-01.pdf [file NIHMS227374-supplement-01.pdf]
